# Supplementary material for: Inflammatory bowel disease and patterns of volatile organic compounds in the exhaled breath of children: A case-control study using Ion Molecule Reaction-Mass Spectrometry
Source: PubMed Central journal article supplement (PMC5578606; doi:10.1371/journal.pone.0184118), 2017-08-31

**S4 Figure. Receiver operating characteristic curve for the model with calibrated VOCs comparing IBD cases (Crohn's disease and ulcerative colitis cases) vs. controls (both gastrointestinal and surgical controls).**

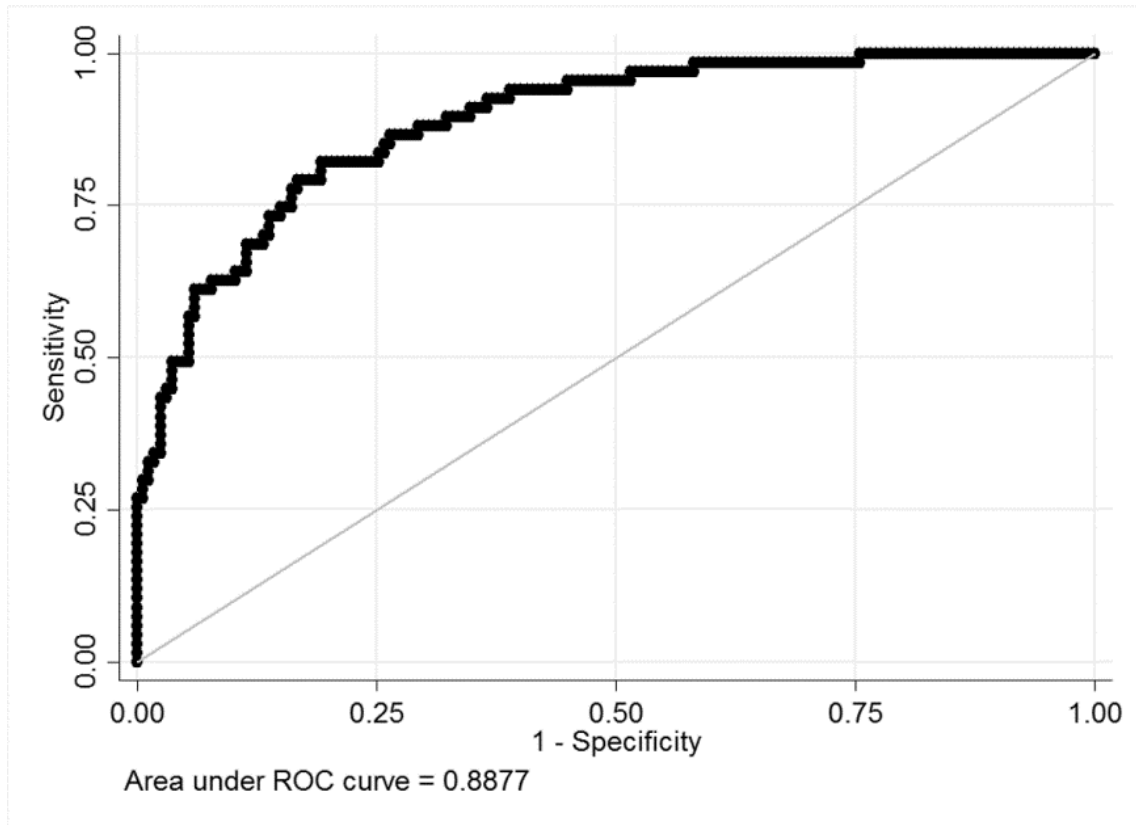

Supplement: pone.0184118.s005.pdf [file pone.0184118.s005.pdf]
