# Supplementary material for: Inflammatory bowel disease and patterns of volatile organic compounds in the exhaled breath of children: A case-control study using Ion Molecule Reaction-Mass Spectrometry
Source: PubMed Central journal article supplement (PMC5578606; doi:10.1371/journal.pone.0184118), 2017-08-31
Supplement: pone.0184118.s006.pdf [file pone.0184118.s006.pdf]

**S1 Table. Mean values and 95% confidence intervals in parts per million of the 81 volatile organic compounds included in the predictive models, and measured by ion-molecule reaction-mass spectrometry in environmental air and exhaled breath air samples.**

**part 1**

| Molecules                                                  | Environment            | Controls               | Cases with Crohn's Disease | Cases with Ulcerative Colitis |
|------------------------------------------------------------|------------------------|------------------------|----------------------------|-------------------------------|
| CH <sub>4</sub> – Methane                                  | 2.023 (1.961 – 2.084)  | 2.241 (1.932 – 2.550)  | 1.434 (1.247 - 1.621)      | 1.454 (1.299 - 1.609)         |
| C <sub>2</sub> H <sub>2</sub> – Acetylene                  | 55.14 (51.51 – 58.77)  | 57.12 (52.81 - 61.43)  | 51.84 (40.46 - 63.22)      | 51.27 (41.47 - 61.06)         |
| M29                                                        | 844.5 (814.6 – 874.5)  | 1892 (1826 – 1958)     | 1883 (1734 - 2033)         | 1828 (1666 - 1990)            |
| C <sub>2</sub> H <sub>3</sub> N – Acetonitrile             | 111.8 (107.6 – 115.9)  | 142.2 (136.8 – 147.7)  | 132.9 (120.7 - 145.1)      | 135 (123.9 - 146.0)           |
| N <sub>2</sub> O – Nitrous Oxide                           | 321.3 (307.8 – 334.7)  | 4007 (3770 – 4245)     | 4414 (3773 - 5056)         | 3969 (3389 - 4548)            |
| HNO <sub>2</sub> – Nitrous Acid                            | 7.537 (5.736 – 9.337)  | 21.57 (20.52 – 22.61)  | 18.84 (16.43 - 21.24)      | 17.89 (15.86 - 19.92)         |
| C <sub>2</sub> H <sub>4</sub> O <sub>2</sub> – Acetic Acid | 184.8 (178.9 – 190.7)  | 772.8 (712.1 – 833.5)  | 2285 (149 - 4421)          | 1409 (575 - 2244)             |
| NH <sub>3</sub> – Ammonia                                  | 184.2 (170.7 – 197.7)  | 352.4 (323.8 – 381.1)  | 387.5 (311.1 - 464)        | 368 (304 - 431.9)             |
| M19                                                        | 214.5 (200.9 – 228.1)  | 936.9 (830.6 – 1043.1) | 873.9 (618.2 - 1129.7)     | 884.8 (585.8 - 1183.8)        |
| C <sub>2</sub> H <sub>4</sub> – Ethylene                   | 169.7 (161.6 – 177.8)  | 173.0 (162.8 – 183.2)  | 157.1 (133.4 - 180.9)      | 160.3 (135.8 - 184.8)         |
| M33                                                        | 8.198 (7.739 – 8.657)  | 30.51 (27.23 – 33.80)  | 48.28 (26.09 - 70.47)      | 58.13 (21.92 - 94.34)         |
| C <sub>3</sub> H <sub>6</sub> – Propene                    | 160.2 (151.9 – 168.5)  | 277.3 (260.8 – 293.8)  | 345.7 (280 - 411.4)        | 354.1 (260.4 - 447.7)         |
| M43                                                        | 304.9 (294.8 – 315.1)  | 901.5 (819.7 – 983.2)  | 1468 (981 - 1956)          | 1606 (783 - 2429)             |
| C <sub>2</sub> H <sub>4</sub> O – Acetaldehyde             | 181.8 (150.7 – 212.9)  | 616.0 (546.9 – 685.1)  | 762.5 (581.4 - 943.6)      | 843.6 (615.6 - 1071.5)        |
| M45                                                        | 372.6 (268.6 – 476.6)  | 295.0 (266.3 – 323.6)  | 298.2 (226.1 - 370.3)      | 341 (212.7 - 469.3)           |
| C <sub>4</sub> H <sub>6</sub> – Butadiene                  | 8.755 (8.445 – 9.066)  | 11.82 (11.42 – 12.23)  | 11.31 (9.99 - 12.64)       | 11.52 (10.69 - 12.34)         |
| C <sub>4</sub> H <sub>10</sub> O – Butanol                 | 130.0 (124.5 – 135.5)  | 173.5 (166.8 – 180.1)  | 171.6 (151.6 - 191.5)      | 173.6 (156.7 - 190.6)         |
| C <sub>4</sub> H <sub>8</sub> O – Methyl Ethyl Ketone      | 40.67 (39.18 – 42.17)  | 59.78 (56.81 – 62.75)  | 72.2 (59.73 - 84.68)       | 65.75 (53.77 - 77.72)         |
| C <sub>3</sub> H <sub>6</sub> O – Acetone                  | 110.0 (103.9 – 116.1)  | 584.0 (518.5 – 649.4)  | 1047 (611 - 1483)          | 1114 (450 - 1778)             |
| C <sub>3</sub> H <sub>8</sub> O – n-Propanol               | 38.53 (33.65 – 43.40)  | 109.6 (101.7 – 117.4)  | 162.8 (119.4 - 206.2)      | 186.4 (88.3 - 284.5)          |
| M60                                                        | 9.492 (8.897 – 10.099) | 39.82 (37.40 – 42.24)  | 52.35 (38.63 - 66.07)      | 53.93 (34.84 - 73.01)         |
| M61                                                        | 3.644 (3.412 – 3.877)  | 85.73 (75.32 – 96.13)  | 140 (100.2 - 179.7)        | 170.5 (60.8 - 280.3)          |
| M62                                                        | 1.414 (1.287 – 1.542)  | 10.18 (9.36 – 11.00)   | 11.38 (9.35 - 13.42)       | 12.24 (7.07 - 17.4)           |
| M63                                                        | 2.954 (2.453 – 3.456)  | 8.364 (7.728 – 8.999)  | 9.522 (7.754 - 11.29)      | 10.94 (5.96 - 15.92)          |
| M66                                                        | 3.220 (3.008 – 3.432)  | 5.782 (5.376 – 6.189)  | 6.122 (5.3 - 6.944)        | 6.026 (5.316 - 6.736)         |
| M67                                                        | 7.728 (7.338 – 8.118)  | 25.47 (23.66 – 27.29)  | 24.63 (21.53 - 27.73)      | 25.54 (21.1 - 29.98)          |
| C <sub>3</sub> H <sub>8</sub> – Isoprene                   | 32.57 (31.37 – 33.77)  | 173.7 (161.3 – 186.1)  | 158.4 (140.8 - 176.1)      | 165.3 (137.2 - 193.3)         |
| M69                                                        | 34.86 (33.74 – 35.98)  | 43.44 (42.25 – 44.64)  | 40.38 (37.16 - 43.6)       | 42.49 (39.64 - 45.34)         |
| M70                                                        | 65.75 (60.46 – 71.03)  | 80.09 (77.61 – 82.58)  | 74.94 (68.44 - 81.44)      | 86.53 (67.4 - 105.66)         |
| M71                                                        | 24.61 (23.02 – 26.20)  | 36.40 (35.06 – 37.75)  | 37.74 (34.05 - 41.44)      | 40.68 (34.58 - 46.79)         |
| C <sub>5</sub> H <sub>12</sub> – n-Pentane                 | 29.70 (28.77 – 30.64)  | 58.43 (54.77 – 62.09)  | 72.14 (56.49 - 87.79)      | 70.47 (48.94 - 92)            |
| M73                                                        | 5.281 (4.522 – 6.040)  | 17.06 (15.96 – 18.17)  | 19.26 (14.81 - 23.71)      | 20.92 (14.38 - 27.45)         |
| M74                                                        | 5.665 (5.305 – 6.024)  | 33.59 (29.94 – 37.24)  | 28.91 (22.44 - 35.38)      | 32.34 (25.15 - 39.52)         |
| M75                                                        | 1.393 (1.260 – 1.527)  | 6.997 (6.598 – 7.396)  | 7.473 (6.319 - 8.628)      | 8.278 (6.101 - 10.455)        |
| M76                                                        | 1.204 (1.087 – 1.322)  | 6.729 (6.207 – 7.251)  | 8.586 (6.627 - 10.545)     | 10.56 (5.55 - 15.57)          |
| M77                                                        | 6.363 (6.090 – 6.636)  | 31.94 (28.43 – 35.44)  | 35.51 (22.4 - 48.62)       | 54.51 (18.99 - 90.04)         |
| C <sub>6</sub> H <sub>6</sub> – Benzene                    | 8.934 (8.478 – 9.389)  | 68.25 (64.50 – 72.00)  | 62.58 (51.83 - 73.33)      | 61.33 (52.78 - 69.89)         |
| M79                                                        | 3.970 (3.584 – 4.357)  | 9.022 (8.284 – 9.761)  | 10.31 (8.06 - 12.55)       | 10.18 (7.91 - 12.46)          |
| M81                                                        | 45.09 ( 43.14 – 47.04) | 63.50 (60.99 – 66.01)  | 63.98 (57.95 - 70.01)      | 80.29 (50.56 - 110.03)        |
| M82                                                        | 69.17 ( 66.46 – 71.88) | 97.92 (94.29 – 101.54) | 98.39 (90.52 - 106.26)     | 103.9 (94.9 - 112.9)          |
| M83                                                        | 93.08 ( 89.24 – 96.91) | 123.3 (118.8 – 127.7)  | 126.6 (112.8 - 140.5)      | 130.5 (116.8 - 144.3)         |
| M84                                                        | 135.2 ( 129.9 – 140.5) | 185.5 (178.3 – 192.6)  | 196.9 (171.3 - 222.6)      | 201 (174.2 - 227.9)           |
| M85                                                        | 118.3 ( 112.2 – 124.4) | 144.1 (136.7 – 151.5)  | 152.3 (128.5 - 176.1)      | 148.7 (130.7 - 166.7)         |
| C <sub>6</sub> H <sub>14</sub> – n-Hexane                  | 186.6 ( 175.8 – 197.4) | 214.9 (201.6 – 228.3)  | 243.4 (191.2 - 295.7)      | 219.8 (186.3 - 253.3)         |
| M87                                                        | 21.53 (20.55 – 22.51)  | 49.02 (47.01 – 51.02)  | 52.38 (43.21 - 61.55)      | 54.77 (41.01 - 68.53)         |
| M88                                                        | 9.381 ( 8.912 – 9.850) | 41.12 (38.54 – 43.70)  | 41.01 (32.41 - 49.62)      | 45.29 (31.85 - 58.73)         |
| M89                                                        | 1.453 ( 1.172 – 1.734) | 14.37 (12.66 – 16.09)  | 12.34 (9.83 - 14.85)       | 14.7 (9.45 - 19.94)           |

part 2

| Molecules                                  | Environment            | Controls               | Cases with Crohn's Disease | Cases with Ulcerative Colitis |
|--------------------------------------------|------------------------|------------------------|----------------------------|-------------------------------|
| M90                                        | 1.083 (.952 – 1.214)   | 3.815 (3.589 – 4.041)  | 3.693 (3.128 - 4.257)      | 4.049 (3.286 - 4.812)         |
| M91                                        | 3.219 (2.902 – 3.535)  | 5.626 (5.288 – 5.964)  | 6.087 (5.095 - 7.079)      | 6.894 (5.653 - 8.136)         |
| C <sub>7</sub> H <sub>8</sub> – Toluene    | 4.645 (4.304 – 4.985)  | 8.629 (8.249 – 9.008)  | 8.631 (7.584 - 9.679)      | 9.493 (8.051 - 10.935)        |
| M93                                        | 27.15 (25.59 – 28.70)  | 65.49 (62.26 – 68.73)  | 59.8 (51.41 - 68.2)        | 64.85 (57.14 - 72.56)         |
| M94                                        | 54.50 (51.70 – 57.30)  | 153.6 (145.4 – 161.7)  | 148.4 (124.8 - 172.1)      | 180.7 (133 - 228.4)           |
| M95                                        | 44.75 (42.97 – 46.53)  | 124.2 (115.1 – 133.4)  | 133 (94.4 - 171.5)         | 186.3 (84.5 - 288)            |
| M96                                        | 64.77 (61.92 – 67.62)  | 99.00 (95.40 – 102.59) | 98.19 (88.7 - 107.67)      | 107.1 (94.9 - 119.2)          |
| M97                                        | 73.25 (65.49 – 81.02)  | 82.33 (77.44 – 87.23)  | 86.85 (74.99 - 98.71)      | 91.47 (78.7 - 104.25)         |
| M98                                        | 101.7 (86.8 – 116.6)   | 95.10 (87.12 – 103.08) | 97.77 (77.97 - 117.57)     | 104.6 (83.3 - 125.9)          |
| M99                                        | 48.10 (44.90 – 51.29)  | 62.89 (60.79 – 64.99)  | 66.34 (60.51 - 72.16)      | 70.3 (60.84 - 79.76)          |
| C <sub>7</sub> H <sub>16</sub> – n-Heptane | 36.15 (31.44 – 40.87)  | 66.30 (64.27 – 68.33)  | 62.58 (57.04 - 68.12)      | 75.52 (55.86 - 95.18)         |
| M101                                       | 4.007 (3.6517 – 4.363) | 15.75 (14.80 – 16.69)  | 18.12 (14.86 - 21.39)      | 22.73 (13.18 - 32.28)         |
| M102                                       | 2.410 (2.260 – 2.559)  | 15.35 (14.12 – 16.58)  | 18.35 (13.81 - 22.89)      | 24.18 (12 - 36.37)            |
| M103                                       | 2.682 (2.466 – 2.899)  | 16.41 (14.54 – 18.29)  | 20.55 (13.29 - 27.82)      | 28.95 (11.72 - 46.17)         |
| M104                                       | 3.650 (3.390 – 3.909)  | 10.44 (9.77 – 11.10)   | 11.03 (8.88 - 13.17)       | 13.34 (9.22 - 17.45)          |
| M105                                       | 6.299 (5.972 – 6.627)  | 12.63 (12.03 – 13.23)  | 12.47 (11.06 - 13.88)      | 13.51 (12.13 - 14.89)         |
| M106                                       | 7.807 (7.449 – 8.165)  | 13.78 (13.15 – 14.42)  | 13.82 (12.43 - 15.22)      | 14.48 (12.86 - 16.1)          |
| M107                                       | 12.53 (11.97 – 13.09)  | 16.73 (16.06 – 17.40)  | 14.79 (13.19 - 16.39)      | 17.15 (14.66 - 19.65)         |
| M108                                       | 26.16 (25.00 – 27.32)  | 31.77 (30.41 – 33.14)  | 29.5 (25.85 - 33.14)       | 33.53 (28.22 - 38.85)         |
| M109                                       | 22.18 (21.19 – 23.17)  | 28.29 (27.00 – 29.58)  | 31.02 (27.05 - 35)         | 30.88 (27.44 - 34.33)         |
| M110                                       | 22.59 (21.37 – 23.80)  | 34.35 (32.75 – 35.95)  | 36.81 (32.93 - 40.69)      | 37.36 (34.17 - 40.56)         |
| M111                                       | 16.71 (15.81 – 17.62)  | 27.64 (26.49 – 28.79)  | 30.35 (27.35 - 33.35)      | 29.98 (27.16 - 32.79)         |
| M112                                       | 19.05 (18.01 – 20.08)  | 38.83 (37.09 – 40.56)  | 43.02 (35.52 - 50.52)      | 42.46 (35.23 - 49.68)         |
| M113                                       | 9.873 (9.230 – 10.516) | 28.30 (26.50 – 30.09)  | 31.89 (23.49 - 40.28)      | 35.03 (20.14 - 49.92)         |
| M114                                       | 8.805 (8.412 – 9.197)  | 20.65 (19.84 – 21.46)  | 21.75 (18.83 - 24.67)      | 21.34 (17.4 - 25.28)          |
| M115                                       | 1.523 (1.370 – 1.677)  | 10.59 (10.04 – 11.13)  | 12.19 (9.42 - 14.95)       | 12.1 (7.59 - 16.61)           |
| M116                                       | .8066 (.7324 – .8808)  | 6.285 (5.936 – 6.634)  | 6.595 (5.107 - 8.083)      | 7.177 (4.751 - 9.603)         |
| M117                                       | .7256 (.6542 – .7971)  | 5.544 (5.119 – 5.968)  | 5.865 (4.531 - 7.199)      | 5.773 (4.318 - 7.228)         |
| M118                                       | 1.223 (1.128 – 1.317)  | 3.130 (2.956 – 3.304)  | 3.205 (2.739 - 3.67)       | 3.409 (2.908 - 3.909)         |
| M119                                       | 2.312 (2.166 – 2.457)  | 2.918 (2.750 – 3.086)  | 3.276 (2.778 - 3.774)      | 3.2 (2.837 - 3.563)           |
| M120                                       | 3.514 (3.260 – 3.768)  | 4.066 (3.802 – 4.331)  | 4.793 (3.934 - 5.653)      | 4.683 (4.069 - 5.296)         |
| M121                                       | 3.405 (3.160 – 3.650)  | 5.416 (5.079 – 5.754)  | 5.966 (5.155 - 6.777)      | 5.972 (5.305 - 6.638)         |
| M122                                       | 8.727 (8.319 – 9.135)  | 11.83 (11.26 – 12.41)  | 12.71 (11.28 - 14.14)      | 13.46 (11.88 - 15.04)         |
| M123                                       | 19.66 (18.83 – 20.48)  | 22.13 (21.27 – 22.99)  | 23.61 (21.19 - 26.02)      | 24.91 (22.09 - 27.72)         |
