# Supplementary material for: Inflammatory bowel disease and patterns of volatile organic compounds in the exhaled breath of children: A case-control study using Ion Molecule Reaction-Mass Spectrometry
Source: PubMed Central journal article supplement (PMC5578606; doi:10.1371/journal.pone.0184118), 2017-08-31
Supplement: pone.0184118.s007.pdf [file pone.0184118.s007.pdf]

**S1A Table. Pediatric Ulcerative Colitis Activity Index (PUCAI)**

| Item                                                    | Points |
|---------------------------------------------------------|--------|
| <b>1. Abdominal pain:</b>                               |        |
| No pain                                                 | 0      |
| Pain can be ignored                                     | 5      |
| Pain cannot be ignored                                  | 10     |
| <b>2. Rectal bleeding</b>                               |        |
| None                                                    | 0      |
| Small amount only, in less than 50% of stools           | 10     |
| Small amount with most stools                           | 20     |
| Large amount (>50% of the stool content)                | 30     |
| <b>3. Stool consistency of most stools</b>              |        |
| Formed                                                  | 0      |
| Partially formed                                        | 5      |
| Completely unformed                                     | 10     |
| <b>4. Number of stools per 24 hours</b>                 |        |
| 0-2                                                     | 0      |
| 3-5                                                     | 5      |
| 6-8                                                     | 10     |
| >8                                                      | 15     |
| <b>5. Nocturnal stools (any episode causing waking)</b> |        |
| No                                                      | 0      |
| Yes                                                     | 10     |
| <b>6. Activity level</b>                                |        |
| No limitation of activity                               | 0      |
| Occasional limitation of activity                       | 5      |
| Severe restricted activity                              | 10     |
| <b>SUM OF PUCAI (0-85)</b>                              |        |

© Copyright to The Hospital for Sick Children, Toronto, Canada, 2006.

From: Turner D, Otley AR, Mack D, et al. Development, validation, and evaluation of a pediatric ulcerative colitis activity index: a prospective multicenter study. *Gastroenterology*. 2007;133(2):423-32.

**S1B Table. Pediatric Crohn's Disease Activity Index (PCDAI)**

| <b>HISTORY (Recall: 1 week)</b>                                                                                                          |                                  |    |
|------------------------------------------------------------------------------------------------------------------------------------------|----------------------------------|----|
| <b>Abdominal pain</b>                                                                                                                    |                                  |    |
| None                                                                                                                                     |                                  | 0  |
| Mild-- Brief, does not interfere with activities                                                                                         |                                  | 5  |
| Mod/severe - daily, longer lasting affects activities, nocturnal                                                                         |                                  | 10 |
| <b>Stools (per day)</b>                                                                                                                  |                                  |    |
| Formed stools or up to 1 liquid stool, no blood                                                                                          |                                  | 0  |
| Up to 2 semi-formed with small blood, or 2-5 liquid with or without small blood                                                          |                                  | 5  |
| Any gross bleeding, or $\geq 6$ liquid, or nocturnal diarrhea                                                                            |                                  | 10 |
| <b>Patient Functioning -- General Well-Being</b>                                                                                         |                                  |    |
| No Limitation of activities, well                                                                                                        |                                  | 0  |
| Occasional difficulty in maintaining appropriate activities, below par                                                                   |                                  | 5  |
| Frequent limitation of activity, very poor                                                                                               |                                  | 10 |
| <b>EXAMINATION</b>                                                                                                                       |                                  |    |
| <b>Weight</b>                                                                                                                            |                                  |    |
| Weight gain or voluntary weight stable/loss                                                                                              |                                  | 0  |
| Involuntary weight stable, weight loss 1-9%                                                                                              |                                  | 5  |
| Weight loss $\geq 10\%$                                                                                                                  |                                  | 10 |
| <b>Height</b>                                                                                                                            |                                  |    |
| <b>At diagnosis</b>                                                                                                                      | <1 channel decrease              | 0  |
|                                                                                                                                          | $\geq 1, < 2$ channel decrease   | 5  |
|                                                                                                                                          | >2 channel decrease              | 10 |
| <b>Follow-up</b>                                                                                                                         | Height velocity $\geq -1SD$      | 0  |
|                                                                                                                                          | Height velocity $< -1SD, > -2SD$ | 5  |
|                                                                                                                                          | Height velocity $\leq -2SD$      | 10 |
| <b>Abdomen</b>                                                                                                                           |                                  |    |
| No tenderness, no mass                                                                                                                   |                                  | 0  |
| Tenderness, or mass without tenderness                                                                                                   |                                  | 5  |
| Tenderness, involuntary guarding, definite mass                                                                                          |                                  | 10 |
| <b>Perirectal disease</b>                                                                                                                |                                  |    |
| None, asymptomatic tags                                                                                                                  |                                  | 0  |
| Inflamed tags or 1-2 indolent fistula(e) or fissure(s), scant drainage, no tenderness                                                    |                                  | 5  |
| Active fistula, drainage, tenderness, or abscess                                                                                         |                                  | 10 |
| <b>Extra-intestinal Manifestations</b>                                                                                                   |                                  |    |
| (Fever $\geq 38.5^{\circ}C$ for 3 days over past week, oral ulcers, definite arthritis, uveitis, erythema nodosum, pyoderma gangrenosum) | None                             | 0  |
|                                                                                                                                          | One                              | 5  |
|                                                                                                                                          | $\geq$ Two                       | 10 |

| <b>LABORATORY</b>          |                     |                    |                    |                    |     |
|----------------------------|---------------------|--------------------|--------------------|--------------------|-----|
| <b>HCT (%)</b>             | <b>&lt;10 years</b> | <b>11-19 yrs F</b> | <b>11-14 yrs M</b> | <b>15-19 yrs M</b> |     |
|                            | >33                 | >34                | >35                | >37                | 0   |
|                            | 28-32               | 29-33              | 30-34              | 32-36              | 2.5 |
|                            | <28                 | <29                | <30                | <32                | 5   |
| <b>ESR (mm/hr)</b>         |                     |                    |                    |                    |     |
|                            | <20                 |                    |                    |                    | 0   |
|                            | 20-50               |                    |                    |                    | 2.5 |
|                            | >50                 |                    |                    |                    | 5   |
| <b>Albumin (gr/dL)</b>     |                     |                    |                    |                    |     |
|                            | >3.5                |                    |                    |                    | 0   |
|                            | 3.1-3.4             |                    |                    |                    | 2.5 |
|                            | <3.0                |                    |                    |                    | 5   |
| <b>TOTAL SCORE (0-105)</b> |                     |                    |                    |                    |     |

From: Hyams JS, Ferry GD, Mandel FS, et al. Development and validation of a pediatric Crohn's disease activity index. J Pediatr Gastroenterol Nutr. 1991;12:439-447.

**S1C Table. Description of the Crohn's disease cases enrolled in the study (n=34)**

|                                            | Frequencies (percentages) or Median (IQR) |
|--------------------------------------------|-------------------------------------------|
| Age at onset:                              |                                           |
| - A1a (0 to 9 years)                       | 11 (32%)                                  |
| - A1b (10 to 17 years)                     | 23 (68%)                                  |
| Location:                                  |                                           |
| - L1, terminal ileum                       | 7 (21%)                                   |
| - L2, colon                                | 4 (12%)                                   |
| - L3, ileocolon                            | 12 (35%)                                  |
| - L4, upper gastrointestinal               | 2 (6%)                                    |
| - L3 + L4                                  | 6 (18%)                                   |
| - L3 + L5                                  | 1 (3%)                                    |
| - L3 + L4 + L5                             | 2 (6%)                                    |
| Behavior:                                  |                                           |
| - B1, non-stricturing non-penetrating      | 18 (53%)                                  |
| - B2, stricturing                          | 13 (38%)                                  |
| - B3, penetrating                          | 2 (6%)                                    |
| -B2 + B3                                   | 1 (3%)                                    |
| Growth delay:                              |                                           |
| - G0, no evidence of growth delay          | 12 (35%)                                  |
| - G1, growth delay                         | 22 (65%)                                  |
| PCDAI=0                                    | 11 (32%)                                  |
| PCDAI if PCDAI≠0 (n=23)                    | 10.0 (5.0 - 17.5)                         |
| Perianal disease, yes                      | 5/34 (15%)                                |
| Associated pathology                       |                                           |
| - No                                       | 24 (71%)                                  |
| - Dermatologic diseases                    | 6 (18)                                    |
| - Hepatic diseases                         | 1 (3%)                                    |
| - Eye diseases                             | 1 (3%)                                    |
| - Oligoarticular arthritis                 | 1 (3%)                                    |
| - Eosinophilic Enterocolitis               | 1 (3%)                                    |
| Therapies:                                 |                                           |
| - Azathioprine                             | 9                                         |
| - Thalidomide                              | 8                                         |
| - Infliximab/Adalimumab                    | 4                                         |
| - Cortisone/corticosteroids + Azathioprine | 3                                         |
| - Antibiotics                              | 2                                         |
| - Methotrexate                             | 2                                         |
| - Other therapies                          | 5                                         |
| - No therapy                               | 1                                         |

IQR: interquartile range.

**S1D Table. Description of the Ulcerative Colitis cases enrolled in the study (n=33)**

|                                                    | Frequencies (percentages) or Median (IQR) |
|----------------------------------------------------|-------------------------------------------|
| Extent:                                            |                                           |
| - E1, Proctitis                                    | 1 (3%)                                    |
| - E2, Left sided                                   | 6 (18%)                                   |
| - E3, Extensive                                    | 3 (9%)                                    |
| - E4, Pancolitis                                   | 23 (70%)                                  |
| Severity:                                          |                                           |
| - S0, never severe                                 | 26 (79%)                                  |
| - S1, ever severe                                  | 7 (21%)                                   |
| PUCAI=0                                            | 19 (58%)                                  |
| PUCAI if PUCAI≠0 (n=14)                            | 22.5 (10 - 45)                            |
| Associated pathology                               |                                           |
| - No                                               | 24 (73%)                                  |
| - Hepatic diseases                                 | 7 (21%)                                   |
| - Previous juvenile idiopathic arthritis           | 1 (3%)                                    |
| - Idiopathic portal hypertension                   | 1 (3%)                                    |
| Therapies:                                         |                                           |
| - Mesalazine/Sulfasalazine                         | 11                                        |
| - Azathioprine + Mesalazine/Sulfasalazine          | 10                                        |
| - Mesalazine/Sulfasalazine + Thalidomide           | 2                                         |
| - Mesalazine/Sulfasalazine + Infliximab/Adalimumab | 2                                         |
| - Other therapies                                  | 6                                         |
| - No therapy                                       | 2                                         |

**S1E Table. Diagnoses of the Gastroenterological controls enrolled in the study (n=65)**

| <b>Diagnoses</b>               | <b>Frequencies (percentages)</b> |
|--------------------------------|----------------------------------|
| Celiac disease                 | 22 (34%)                         |
| Eosinophilic esophagitis       | 6 (9%)                           |
| Recurrent abdominal pain       | 4 (6%)                           |
| Constipation                   | 3 (5%)                           |
| Gastritis                      | 3 (5%)                           |
| Probable latent celiac disease | 2 (3%)                           |
| Functional dysphagia           | 2 (3%)                           |
| Biliary duct atresia           | 2 (3%)                           |
| Other (all single frequencies) | 21 (32%)                         |
