# Supplementary material for: Inflammatory bowel disease and patterns of volatile organic compounds in the exhaled breath of children: A case-control study using Ion Molecule Reaction-Mass Spectrometry
Source: PubMed Central journal article supplement (PMC5578606; doi:10.1371/journal.pone.0184118), 2017-08-31
Supplement: pone.0184118.s008.pdf [file pone.0184118.s008.pdf]

**S2A Table. Description of the Crohn's disease cases enrolled in the study (n=34)**

|                                            | Frequencies (percentages) or Median (IQR) |
|--------------------------------------------|-------------------------------------------|
| Age at onset:                              |                                           |
| - A1a (0 to 9 years)                       | 11 (32%)                                  |
| - A1b (10 to 17 years)                     | 23 (68%)                                  |
| Location:                                  |                                           |
| - L1, terminal ileum                       | 7 (21%)                                   |
| - L2, colon                                | 4 (12%)                                   |
| - L3, ileocolon                            | 12 (35%)                                  |
| - L4, upper gastrointestinal               | 2 (6%)                                    |
| - L3 + L4                                  | 6 (18%)                                   |
| - L3 + L5                                  | 1 (3%)                                    |
| - L3 + L4 + L5                             | 2 (6%)                                    |
| Behavior:                                  |                                           |
| - B1, non-stricturing non-penetrating      | 18 (53%)                                  |
| - B2, stricturing                          | 13 (38%)                                  |
| - B3, penetrating                          | 2 (6%)                                    |
| -B2 + B3                                   | 1 (3%)                                    |
| Growth delay:                              |                                           |
| - G0, no evidence of growth delay          | 12 (35%)                                  |
| - G1, growth delay                         | 22 (65%)                                  |
| PCDAI=0                                    | 11 (32%)                                  |
| PCDAI if PCDAI≠0 (n=23)                    | 10.0 (5.0 - 17.5)                         |
| Perianal disease, yes                      | 5/34 (15%)                                |
| Associated pathology                       |                                           |
| - No                                       | 24 (71%)                                  |
| - Dermatologic diseases                    | 6 (18)                                    |
| - Hepatic diseases                         | 1 (3%)                                    |
| - Eye diseases                             | 1 (3%)                                    |
| - Oligoarticular arthritis                 | 1 (3%)                                    |
| - Eosinophilic Enterocolitis               | 1 (3%)                                    |
| Therapies:                                 |                                           |
| - Azathioprine                             | 9                                         |
| - Thalidomide                              | 8                                         |
| - Infliximab/Adalimumab                    | 4                                         |
| - Cortisone/corticosteroids + Azathioprine | 3                                         |
| - Antibiotics                              | 2                                         |
| - Methotrexate                             | 2                                         |
| - Other therapies                          | 5                                         |
| - No therapy                               | 1                                         |

IQR: interquartile range.

**S2B Table. Description of the Ulcerative Colitis cases enrolled in the study (n=33)**

|                                                    | Frequencies (percentages) or Median (IQR) |
|----------------------------------------------------|-------------------------------------------|
| Extent:                                            |                                           |
| - E1, Proctitis                                    | 1 (3%)                                    |
| - E2, Left sided                                   | 6 (18%)                                   |
| - E3, Extensive                                    | 3 (9%)                                    |
| - E4, Pancolitis                                   | 23 (70%)                                  |
| Severity:                                          |                                           |
| - S0, never severe                                 | 26 (79%)                                  |
| - S1, ever severe                                  | 7 (21%)                                   |
| PUCAI=0                                            | 19 (58%)                                  |
| PUCAI if PUCAI≠0 (n=14)                            | 22.5 (10 - 45)                            |
| Associated pathology                               |                                           |
| - No                                               | 24 (73%)                                  |
| - Hepatic diseases                                 | 7 (21%)                                   |
| - Previous juvenile idiopathic arthritis           | 1 (3%)                                    |
| - Idiopathic portal hypertension                   | 1 (3%)                                    |
| Therapies:                                         |                                           |
| - Mesalazine/Sulfasalazine                         | 11                                        |
| - Azathioprine + Mesalazine/Sulfasalazine          | 10                                        |
| - Mesalazine/Sulfasalazine + Thalidomide           | 2                                         |
| - Mesalazine/Sulfasalazine + Infliximab/Adalimumab | 2                                         |
| - Other therapies                                  | 6                                         |
| - No therapy                                       | 2                                         |

**S2C Table. Diagnoses of the Gastroenterological controls enrolled in the study (n=65)**

| <b>Diagnoses</b>               | <b>Frequencies (percentages)</b> |
|--------------------------------|----------------------------------|
| Celiac disease                 | 22 (34%)                         |
| Eosinophilic esophagitis       | 6 (9%)                           |
| Recurrent abdominal pain       | 4 (6%)                           |
| Constipation                   | 3 (5%)                           |
| Gastritis                      | 3 (5%)                           |
| Probable latent celiac disease | 2 (3%)                           |
| Functional dysphagia           | 2 (3%)                           |
| Biliary duct atresia           | 2 (3%)                           |
| Other (all single frequencies) | 21 (32%)                         |
